# Supplementary material
Source: PubMed Central journal article supplement (PMC8504949)

**A****Cx43<sup>+/+</sup>**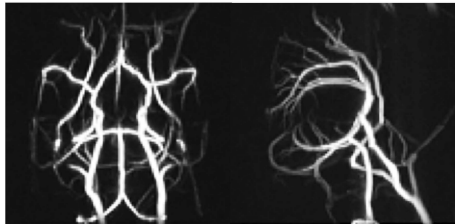**Cx43<sup>+/-</sup>**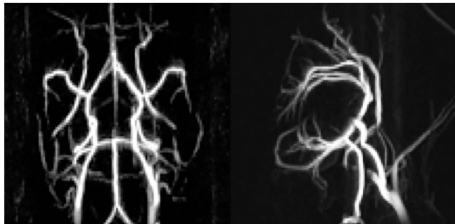

Supplement: sj-pdf-2-jcb-10.1177_0271678X211010354.pdf [file sj-pdf-2-jcb-10.1177_0271678X211010354.pdf]

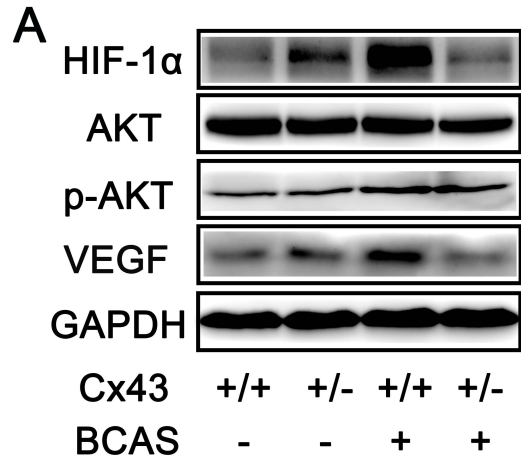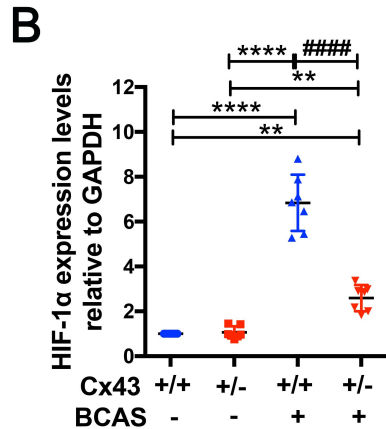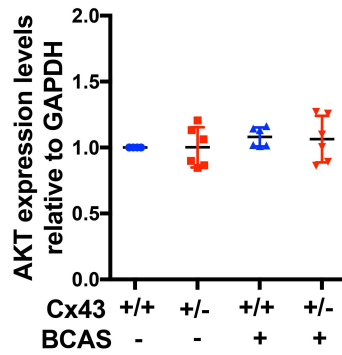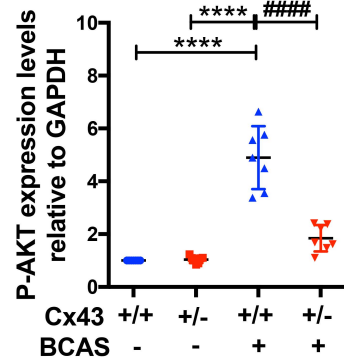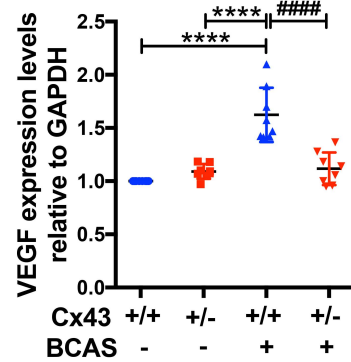

Supplement: sj-pdf-3-jcb-10.1177_0271678X211010354.pdf [file sj-pdf-3-jcb-10.1177_0271678X211010354.pdf]

**A**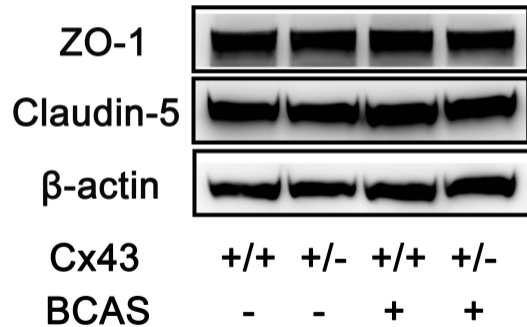**B**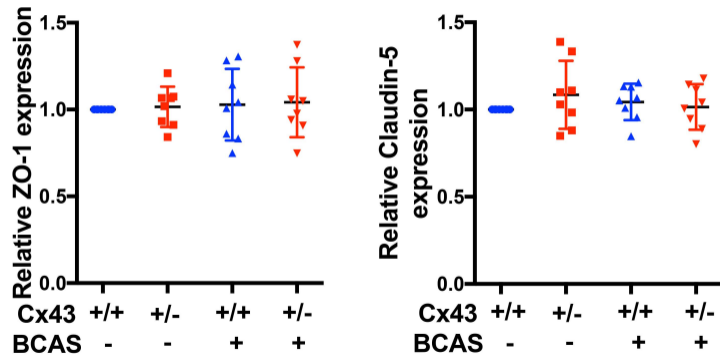

Supplement: sj-pdf-4-jcb-10.1177_0271678X211010354.pdf [file sj-pdf-4-jcb-10.1177_0271678X211010354.pdf]
